# Supplementary material for: Case-Crossover Spatial Lag Grid Differences Between Aerosol Optical Depth-PM2.5 and Respiratory-Cardiovascular Emergency Department Visits and Inpatient Hospitalizations in Baltimore, Maryland, USA: Identification of Homogeneous Spatial Areas
Source: Preprints.org preprint supplement (doi:10.20944/preprints202201.0118.v2), 2022-03-28
Supplement: Supplementary file 1 [file supplementary]

## Supplementary File

Manuscript title: Case-Crossover Spatial Lag Grid Differences Between Aerosol Optical Depth-PM<sub>2.5</sub> and Respiratory-Cardiovascular Emergency Department Visits and Inpatient Hospitalizations in Baltimore, Maryland, USA: Identification of Homogeneous Spatial Areas

Journal name: Atmosphere

Author names: John T. Braggio, Eric S. Hall, Stephanie A. Weber, and Amy K. Huff

Corresponding author: John T. Braggio, Maryland Department of Health, Baltimore, MD, 21201, USA; Mt. Diablo Analytical Solutions and Reporting Institute, LLC (Diablo Analytical Institute, DAI), 3474 Tice Creek Drive, Unit 7, Walnut Creek, CA 94595, USA. Email; [johnhtbs@msn.com](mailto:johnhtbs@msn.com); Cell: (+1) 510-520-5149 (permanent address)

### Four Figures and Two Tables

Figure S1: ED asthma ORs (95% CIs) for the four AOD-PM<sub>2.5</sub> and baseline PMB fused surfaces during the warm and cold seasons at lag grids 0 (S1a), 1 (S1b), 01 (S1c), and 04 (S1d).

Figure S2: IP asthma ORs (95% CIs) for the four AOD-PM<sub>2.5</sub> and baseline PMB fused surfaces during the warm and cold seasons at lag grids 0 (S2a), 1 (S2b), 01 (S2c), and 04, (S2d).

Figure S3: IP MI ORs (95% CIs) for the four AOD-PM<sub>2.5</sub> and baseline PMB fused surfaces during the warm and cold seasons at lag grids 0 (S3a), 1 (S3b), 01 (S3c), and 04 (S3d).

Figure S4: IP HF ORs (95% CIs) for the four AOD-PM<sub>2.5</sub> and baseline PMB fused surfaces during the warm and cold seasons at lag grids 0 (S4a), 1 (S4b), 01 (S4c), and 04 (S4d).

Table S1: No monitor - Monitor OR Difference Percent ( $\Delta$ OR%) for the Four AOD-PM<sub>2.5</sub> and Baseline PMB Fused Surfaces and the Four Respiratory-Cardiovascular ED Visits and IP Hospitalizations Spatial Lag Grid and Temporal Lag Day Analyses in the Baltimore Study Area.

Table S2: Warm - Cold Season OR Difference Percent ( $\Delta$ OR%) for the Four AOD-PM<sub>2.5</sub> and Baseline PMB Fused Surfaces and the Four Respiratory-Cardiovascular ED Visits and IP Hospitalizations Spatial Lag Grid and Temporal Lag Day Analyses in the Baltimore Study Area.

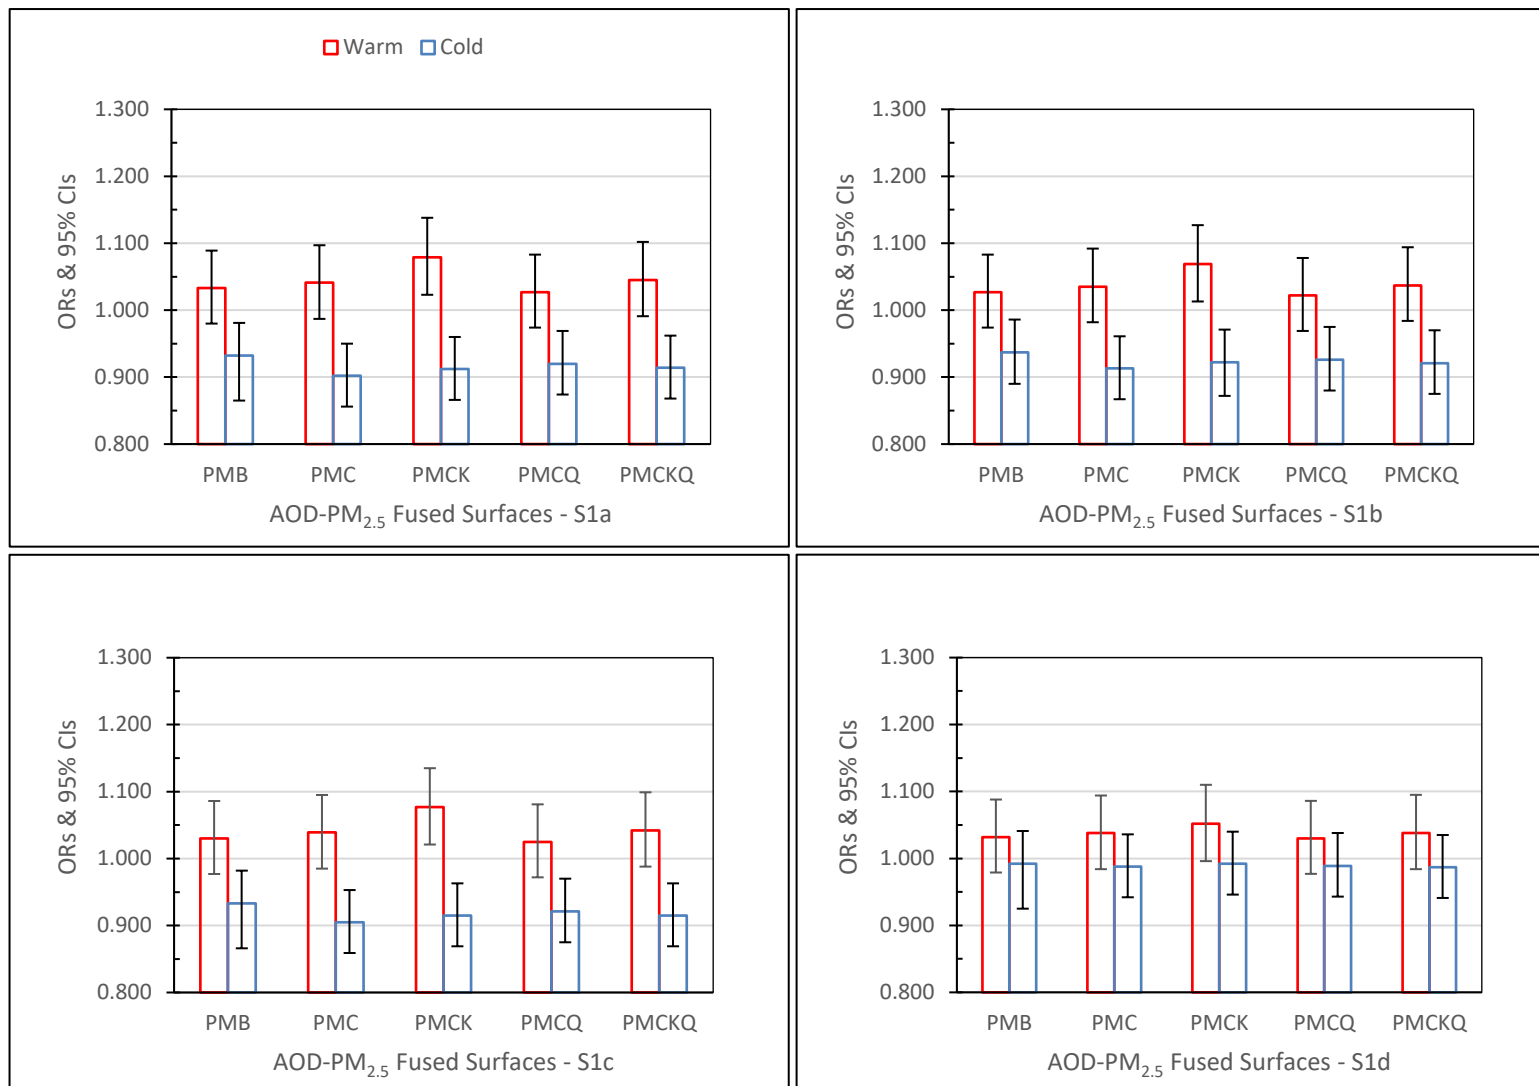

Figure S1: ED asthma ORs (95% CIs) for the four AOD-PM<sub>2.5</sub> and baseline PMB fused surfaces during the warm and cold seasons at lag grids 0 (S1a), 1 (S1b), 01 (S1c), and 04 (S1d).

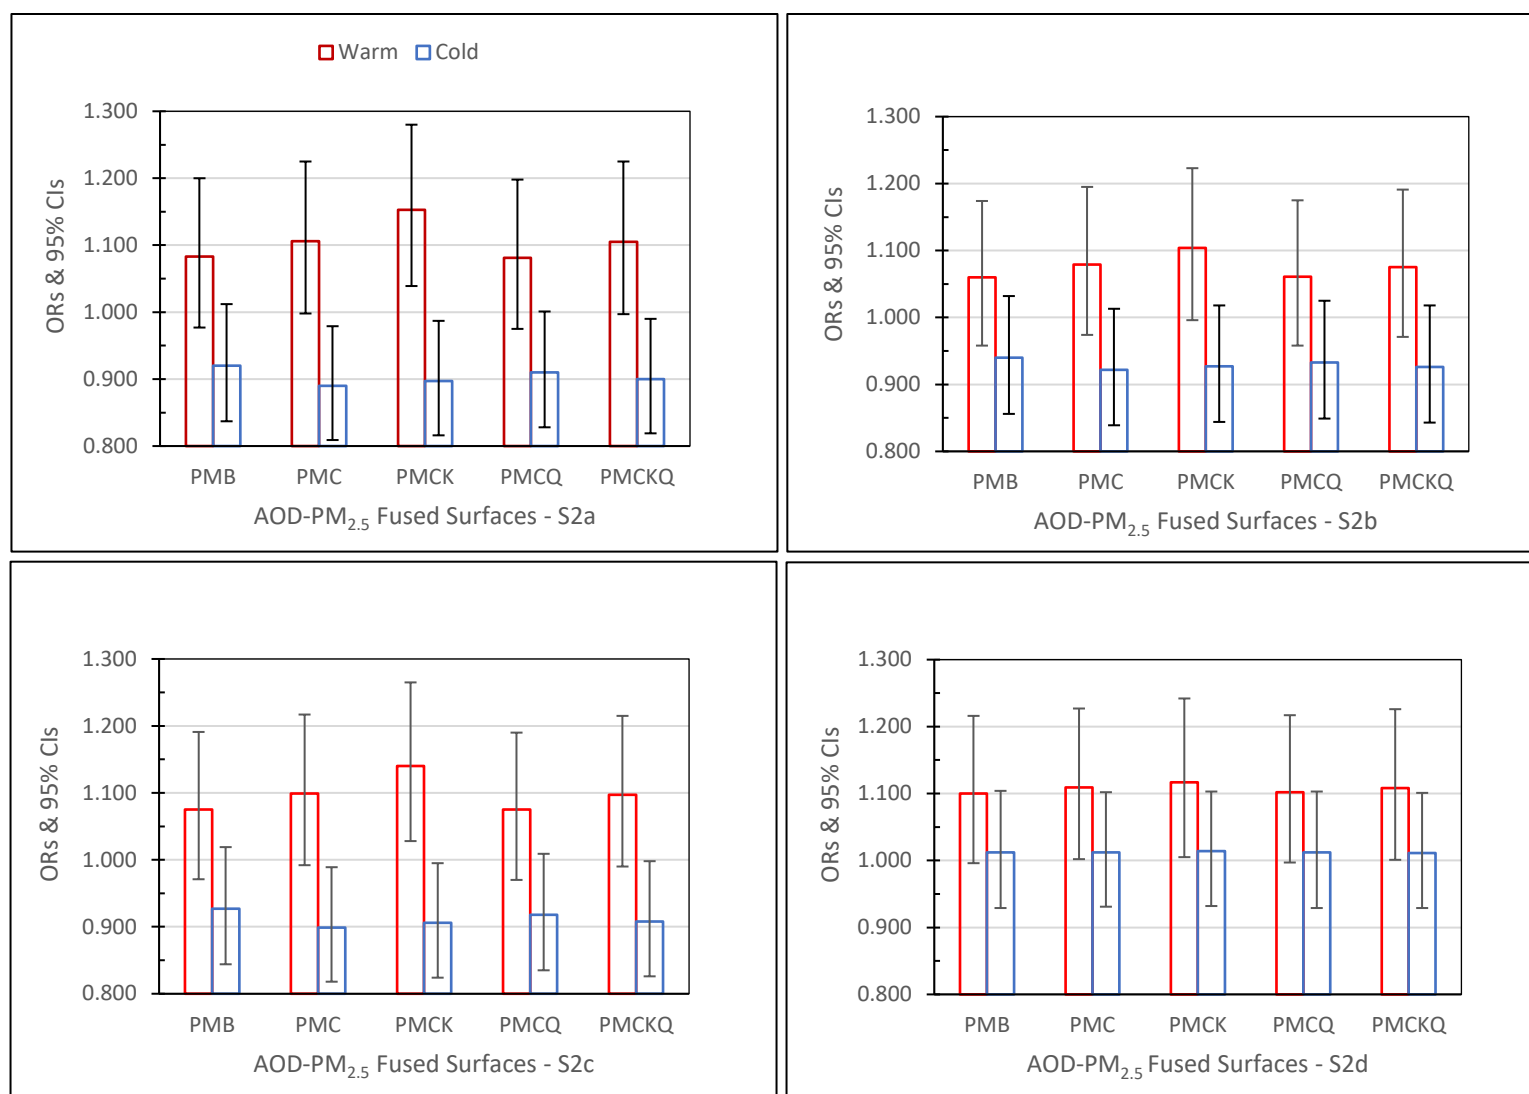

Figure S2: IP asthma ORs (95% CIs) for the four AOD-PM<sub>2.5</sub> and baseline PMB fused surfaces during the warm and cold seasons at lag grids 0 (S2a), 1 (S2b), 01, (S2c), and 04 (S2d).

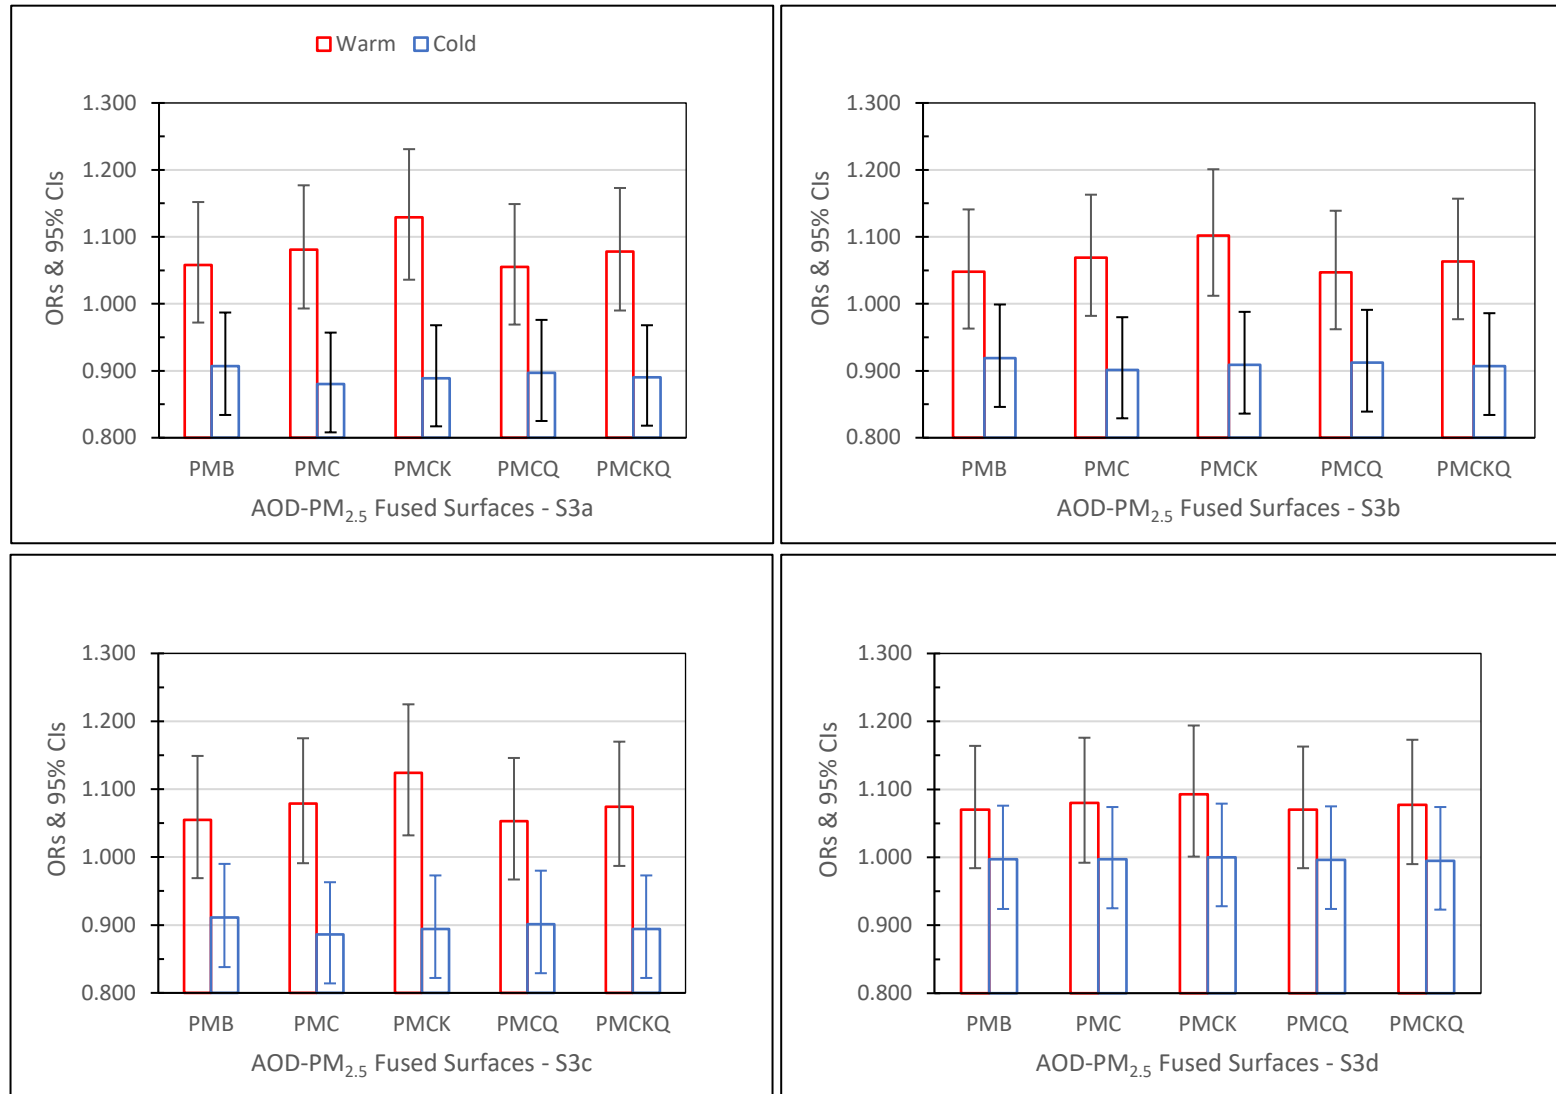

Figure S3: IP MI ORs (95% CIs) for the four AOD-PM<sub>2.5</sub> and baseline PMB fused surfaces during the warm and cold seasons at lag grids 0 (S3a), 1 (S3b), 01 (S3c), and 04 (S3d).

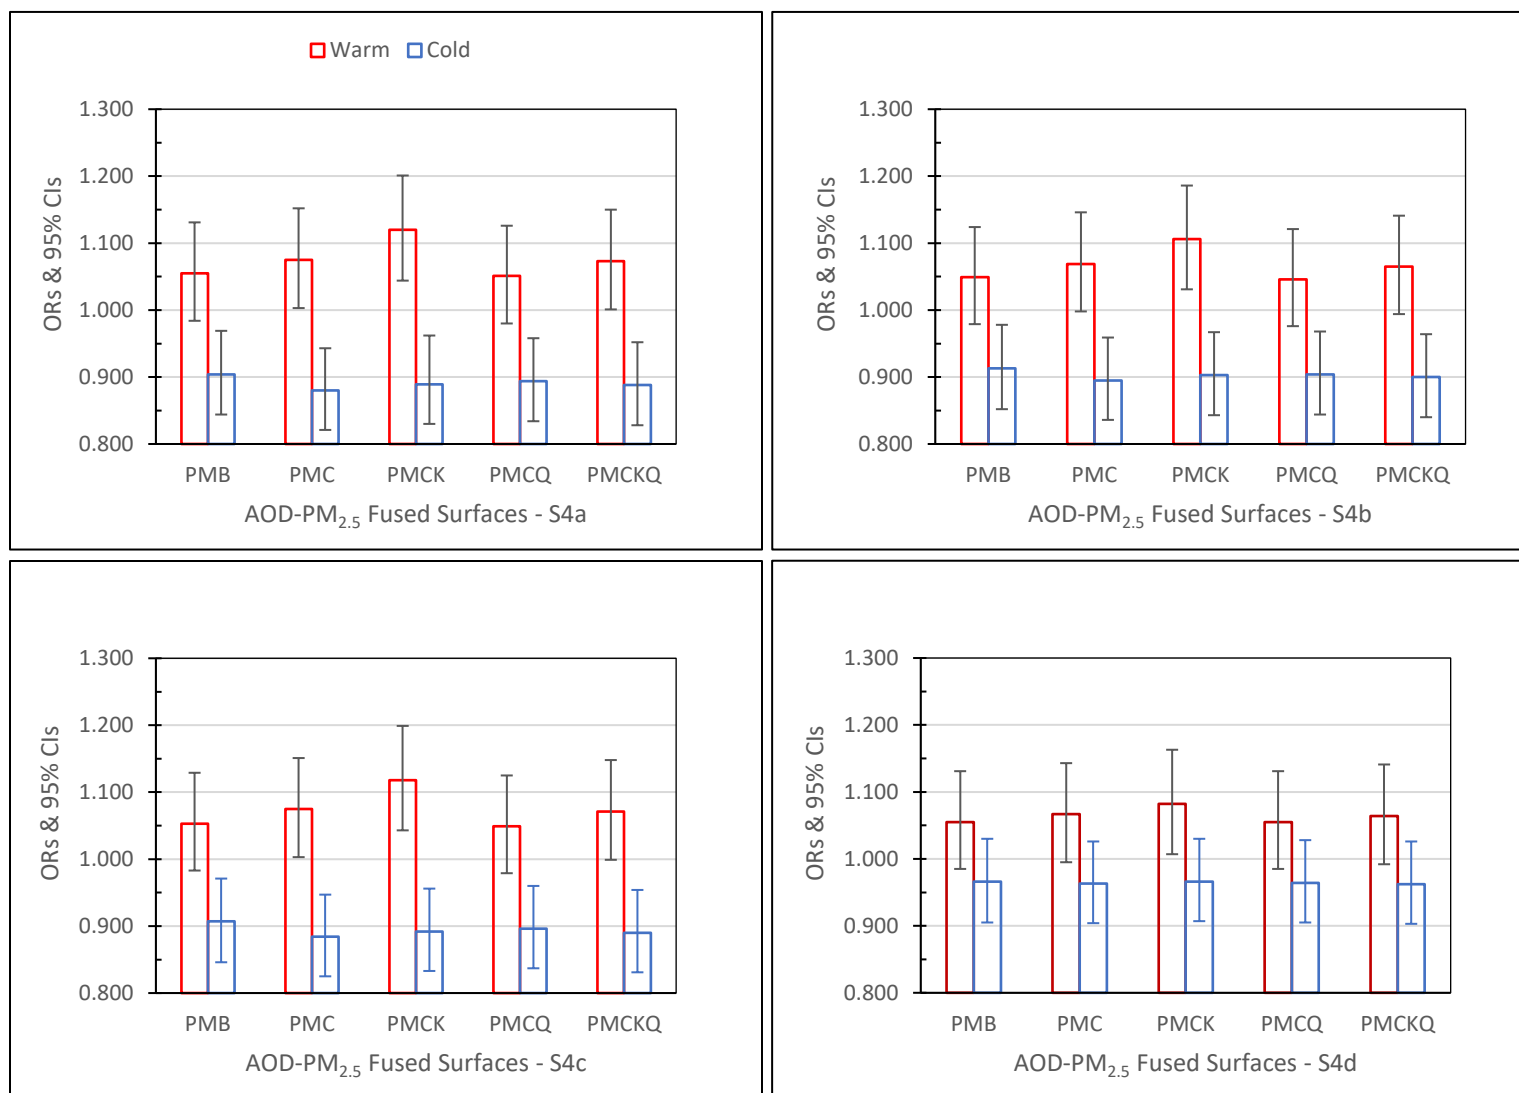

Figure S4: IP HF ORs (95% CIs) for the four AOD-PM<sub>2.5</sub> and baseline PMB fused surfaces during the warm and cold seasons at lag grids 0 (S4a), 1 (S4b), 01 (S4c), and 04 (S4d).

Table S1: No Monitor - Monitor OR Difference Percent ( $\Delta$ OR%) for the Four AOD-PM<sub>2.5</sub> and Baseline PMB Fused Surfaces and the Four Respiratory-Cardiovascular ED Visits and IP Hospitalizations Spatial Lag Grid and Temporal Lag Day Analyses in the Baltimore Study Area.

| Case-Crossover Lag Grid or Lag Day Analyses <sup>1-4</sup> |                |                     |                     |                     |                     |                     |                     |                     |                     |
|------------------------------------------------------------|----------------|---------------------|---------------------|---------------------|---------------------|---------------------|---------------------|---------------------|---------------------|
| Lag Value                                                  | Fused Surfaces | Grids               |                     |                     |                     | Days                |                     |                     |                     |
|                                                            |                | ED AS               | IP AS               | IP MI               | IP HF               | ED AS               | IP AS               | IP MI               | IP HF               |
| 0                                                          | PMB            | -0.7 <sup>†,‡</sup> | -0.9 <sup>†,‡</sup> | -0.7 <sup>†,‡</sup> | -0.6 <sup>†,‡</sup> | -0.7 <sup>†,‡</sup> | -0.9 <sup>†,‡</sup> | -0.7 <sup>†,‡</sup> | -0.6 <sup>†,‡</sup> |
|                                                            | PMC            | 2.0 <sup>†,†</sup>  | 1.7 <sup>†,‡</sup>  | 2.2 <sup>†,‡</sup>  | 2.0 <sup>†,‡</sup>  | 2.0 <sup>†,‡</sup>  | 1.7 <sup>†,‡</sup>  | 2.2 <sup>†,‡</sup>  | 2.0 <sup>†,‡</sup>  |
|                                                            | PMCK           | 2.3 <sup>†,‡</sup>  | 2.5 <sup>†,‡</sup>  | 2.5 <sup>†,‡</sup>  | 2.3 <sup>†,‡</sup>  | 2.3 <sup>†,‡</sup>  | 2.5 <sup>†,‡</sup>  | 2.5 <sup>†,‡</sup>  | 2.3 <sup>†,‡</sup>  |
|                                                            | PMCQ           | 0.0 <sup>†,‡</sup>  | -0.4 <sup>†,‡</sup> | 0.0 <sup>†,‡</sup>  | -0.1 <sup>†,‡</sup> | 0.0 <sup>†,‡</sup>  | -0.4 <sup>†,‡</sup> | 0.0 <sup>†,‡</sup>  | -0.1 <sup>†,‡</sup> |
|                                                            | PMCKQ          | 0.7 <sup>†,‡</sup>  | 0.5 <sup>†,‡</sup>  | 0.7 <sup>†,‡</sup>  | 0.7 <sup>†,†</sup>  | 0.7 <sup>†,‡</sup>  | 0.5 <sup>†,‡</sup>  | 0.7 <sup>†,‡</sup>  | 0.7 <sup>†,‡</sup>  |
| 1                                                          | PMB            | -0.5 <sup>†,‡</sup> | -0.6 <sup>†,‡</sup> | -0.5 <sup>†,‡</sup> | -0.5 <sup>†,‡</sup> | -0.7 <sup>†,‡</sup> | -1.0 <sup>†,‡</sup> | -0.7 <sup>†,‡</sup> | -0.6 <sup>†,‡</sup> |
|                                                            | PMC            | 1.9 <sup>†,‡</sup>  | 1.1 <sup>†,‡</sup>  | 1.8 <sup>†,‡</sup>  | 1.8 <sup>†,‡</sup>  | 2.1 <sup>†,‡</sup>  | 1.6 <sup>†,‡</sup>  | 2.1 <sup>†,‡</sup>  | 1.9 <sup>†,‡</sup>  |
|                                                            | PMCK           | 2.1 <sup>†,‡</sup>  | 1.6 <sup>†,‡</sup>  | 2.0 <sup>†,‡</sup>  | 2.1 <sup>†,‡</sup>  | 2.2 <sup>†,‡</sup>  | 2.4 <sup>†,‡</sup>  | 2.4 <sup>†,‡</sup>  | 2.3 <sup>†,‡</sup>  |
|                                                            | PMCQ           | 0.0 <sup>†,‡</sup>  | -0.2 <sup>†,‡</sup> | 0.0 <sup>†,‡</sup>  | 0.1 <sup>†,‡</sup>  | 0.0 <sup>†,‡</sup>  | -0.4 <sup>†,‡</sup> | 0.0 <sup>†,‡</sup>  | -0.1 <sup>†,‡</sup> |
|                                                            | PMCKQ          | 0.7 <sup>†,‡</sup>  | 0.3 <sup>†,‡</sup>  | 0.6 <sup>†,‡</sup>  | 0.7 <sup>†,‡</sup>  | 0.6 <sup>†,‡</sup>  | 0.4 <sup>†,‡</sup>  | 0.6 <sup>†,‡</sup>  | 0.7 <sup>†,‡</sup>  |
| 01                                                         | PMB            | -0.6 <sup>†,‡</sup> | -0.8 <sup>†,‡</sup> | -0.5 <sup>†,‡</sup> | -0.5 <sup>†,‡</sup> | -0.9 <sup>†,‡</sup> | -1.4 <sup>†,‡</sup> | -1.2 <sup>†,‡</sup> | -1.1 <sup>†,‡</sup> |
|                                                            | PMC            | 2.2 <sup>†,‡</sup>  | 1.7 <sup>†,‡</sup>  | 2.3 <sup>†,‡</sup>  | 2.1 <sup>†,‡</sup>  | 4.5 <sup>†,‡</sup>  | 4.3 <sup>†,‡</sup>  | 5.0 <sup>†,‡</sup>  | 4.3 <sup>†,‡</sup>  |
|                                                            | PMCK           | 2.5 <sup>†,‡</sup>  | 2.6 <sup>†,‡</sup>  | 2.7 <sup>†,‡</sup>  | 2.6 <sup>†,‡</sup>  | 4.7 <sup>†,‡</sup>  | 5.7 <sup>†,‡</sup>  | 5.6 <sup>†,‡</sup>  | 4.8 <sup>†,‡</sup>  |
|                                                            | PMCQ           | 0.0 <sup>†,‡</sup>  | -0.3 <sup>†,‡</sup> | 0.1 <sup>†,‡</sup>  | 0.1 <sup>†,‡</sup>  | 0.2 <sup>†,‡</sup>  | -0.4 <sup>†,‡</sup> | 0.0 <sup>†,‡</sup>  | 0.1 <sup>†,‡</sup>  |
|                                                            | PMCKQ          | 0.9 <sup>†,‡</sup>  | 0.7 <sup>†,‡</sup>  | 0.8 <sup>†,‡</sup>  | 0.9 <sup>†,‡</sup>  | 1.4 <sup>†,‡</sup>  | 1.0 <sup>†,‡</sup>  | 1.1 <sup>†,‡</sup>  | 1.2 <sup>†,‡</sup>  |
| 04                                                         | PMB            | -0.6 <sup>†,‡</sup> | -0.5                | -0.6 <sup>†,‡</sup> | -0.3 <sup>†,‡</sup> |                     |                     |                     |                     |
|                                                            | PMC            | 0.1 <sup>†,‡</sup>  | 0.0 <sup>†</sup>    | 0.3 <sup>†,‡</sup>  | 0.5 <sup>†,‡</sup>  |                     |                     |                     |                     |
|                                                            | PMCK           | 0.2 <sup>†,‡</sup>  | 0.3 <sup>†</sup>    | 0.5 <sup>†,‡</sup>  | 0.5 <sup>†,‡</sup>  |                     |                     |                     |                     |
|                                                            | PMCQ           | -0.4 <sup>†,‡</sup> | -0.4                | -0.4 <sup>†,‡</sup> | -0.2 <sup>†,‡</sup> |                     |                     |                     |                     |
|                                                            | PMCKQ          | -0.3 <sup>†,‡</sup> | -0.2                | -0.2 <sup>†,‡</sup> | -0.1 <sup>†,‡</sup> |                     |                     |                     |                     |

<sup>1</sup>Each cell includes no monitor - monitor  $\Delta$ OR% values. <sup>2</sup>Significance of ORs for monitor grid conditions (grids without [no] or with [yes] air monitors),  $p \leq 0.05$ : † = no, ‡ = yes. <sup>3</sup>Red hue indicates higher lag day value than lag grid value, while blue hue represents lower lag day value than lag grid value. <sup>4</sup>Underlined cell value identifies a difference between the significance of the outcome for a lag grid OR and a lag day OR.

Table S2: Warm - Cold Season OR Difference Percent ( $\Delta$ OR%) for the four AOD-PM<sub>2.5</sub> and Baseline PMB Fused Surfaces and the Four Respiratory-Cardiovascular ED Visits and IP Hospitalizations Spatial Lag Grid and Temporal Lag Day Analyses in the Baltimore Study Area.

| Case-Crossover Lag Grid or Lag Day Analyses <sup>1-4</sup> |                |                     |                     |                     |                     |                     |                     |                     |                     |
|------------------------------------------------------------|----------------|---------------------|---------------------|---------------------|---------------------|---------------------|---------------------|---------------------|---------------------|
| Lag Value                                                  | Fused Surfaces | Grids               |                     |                     |                     | Days                |                     |                     |                     |
|                                                            |                | ED AS               | IP AS               | IP MI               | IP HF               | ED AS               | IP AS               | IP MI               | IP HF               |
| 0                                                          | PMB            | 10.8 <sup>‡</sup>   | 17.7                | 16.6 <sup>‡</sup>   | 16.7 <sup>‡</sup>   | 10.8 <sup>‡</sup>   | 17.7                | 16.6 <sup>‡</sup>   | 16.7 <sup>‡</sup>   |
|                                                            | PMC            | 15.4 <sup>‡</sup>   | 24.3 <sup>‡</sup>   | 22.8 <sup>‡</sup>   | 22.2 <sup>†,‡</sup> | 15.4 <sup>‡</sup>   | 24.3 <sup>‡</sup>   | 22.8 <sup>‡</sup>   | 22.2 <sup>†,‡</sup> |
|                                                            | PMCK           | 18.3 <sup>†,‡</sup> | 28.5 <sup>†,‡</sup> | 27.0 <sup>†,‡</sup> | 26.0 <sup>†,‡</sup> | 18.3 <sup>†,‡</sup> | 28.5 <sup>†,‡</sup> | 27.0 <sup>†,‡</sup> | 26.0 <sup>†,‡</sup> |
|                                                            | PMCQ           | 11.6 <sup>‡</sup>   | 18.8                | 17.6 <sup>‡</sup>   | 17.6 <sup>‡</sup>   | 11.6 <sup>‡</sup>   | 18.8                | 17.6 <sup>‡</sup>   | 17.6 <sup>‡</sup>   |
|                                                            | PMCKQ          | 14.3 <sup>‡</sup>   | 22.8 <sup>‡</sup>   | 21.1 <sup>‡</sup>   | 20.8 <sup>†,‡</sup> | 14.3 <sup>‡</sup>   | 22.8 <sup>‡</sup>   | 21.1 <sup>‡</sup>   | 20.8 <sup>†,‡</sup> |
| 1                                                          | PMB            | 9.6 <sup>‡</sup>    | 12.8                | 14.0 <sup>‡</sup>   | 14.9 <sup>‡</sup>   | 10.6 <sup>‡</sup>   | 16.1                | 16.2 <sup>‡</sup>   | 16.3 <sup>‡</sup>   |
|                                                            | PMC            | 13.4 <sup>‡</sup>   | 17.0                | 18.6 <sup>‡</sup>   | 19.4 <sup>‡</sup>   | 14.7 <sup>‡</sup>   | 21.9 <sup>‡</sup>   | 21.9 <sup>‡</sup>   | 21.5 <sup>†,‡</sup> |
|                                                            | PMCK           | 15.9 <sup>†,‡</sup> | 19.1                | 21.2 <sup>†,‡</sup> | 22.5 <sup>†,‡</sup> | 17.5 <sup>†,‡</sup> | 25.4 <sup>†,‡</sup> | 25.6 <sup>†,‡</sup> | 24.9 <sup>†,‡</sup> |
|                                                            | PMCQ           | 10.4 <sup>‡</sup>   | 13.7                | 14.8 <sup>‡</sup>   | 15.7 <sup>‡</sup>   | 11.4 <sup>‡</sup>   | 17.0                | 17.0 <sup>‡</sup>   | 17.2 <sup>‡</sup>   |
|                                                            | PMCKQ          | 12.6 <sup>‡</sup>   | 16.1                | 17.2 <sup>‡</sup>   | 18.3 <sup>‡</sup>   | 13.9 <sup>‡</sup>   | 20.7 <sup>‡</sup>   | 20.4 <sup>‡</sup>   | 20.3 <sup>‡</sup>   |
| 01                                                         | PMB            | 10.4 <sup>‡</sup>   | 16.0                | 15.8 <sup>‡</sup>   | 16.1 <sup>‡</sup>   | 17.4 <sup>‡</sup>   | 26.8 <sup>‡</sup>   | 26.2 <sup>‡</sup>   | 25.1 <sup>‡</sup>   |
|                                                            | PMC            | 14.8 <sup>‡</sup>   | 22.2 <sup>‡</sup>   | 21.8 <sup>‡</sup>   | 21.6 <sup>†,‡</sup> | 24.6 <sup>‡</sup>   | 38.1 <sup>†,‡</sup> | 36.7 <sup>†,‡</sup> | 33.9 <sup>†,‡</sup> |
|                                                            | PMCK           | 17.7 <sup>†,‡</sup> | 25.8 <sup>†,‡</sup> | 25.7 <sup>†,‡</sup> | 25.3 <sup>†,‡</sup> | 28.4 <sup>†,‡</sup> | 45.2 <sup>†,‡</sup> | 44.1 <sup>†,‡</sup> | 40.5 <sup>†,‡</sup> |
|                                                            | PMCQ           | 11.3 <sup>‡</sup>   | 17.1 <sup>‡</sup>   | 16.9 <sup>‡</sup>   | 17.1 <sup>‡</sup>   | 18.7 <sup>‡</sup>   | 28.6 <sup>‡</sup>   | 27.8 <sup>‡</sup>   | 26.6 <sup>‡</sup>   |
|                                                            | PMCKQ          | 11.3 <sup>‡</sup>   | 20.8 <sup>‡</sup>   | 20.1 <sup>‡</sup>   | 20.3 <sup>‡</sup>   | 23.1 <sup>‡</sup>   | 33.1 <sup>†,‡</sup> | 33.9 <sup>†,‡</sup> | 32.2 <sup>†,‡</sup> |
| 04                                                         | PMB            | 4.0                 | 8.7                 | 7.3                 | 9.2                 |                     |                     |                     |                     |
|                                                            | PMC            | 5.1                 | 9.6                 | 8.3                 | 10.8                |                     |                     |                     |                     |
|                                                            | PMCK           | 6.0                 | 10.2 <sup>†</sup>   | 9.3 <sup>†</sup>    | 12.0 <sup>†</sup>   |                     |                     |                     |                     |
|                                                            | PMCQ           | 4.1                 | 8.9                 | 7.4                 | 9.4                 |                     |                     |                     |                     |
|                                                            | PMCKQ          | 5.2                 | 9.6                 | 8.2                 | 10.6                |                     |                     |                     |                     |

<sup>1</sup>Each cell includes warm - cold season  $\Delta$ OR% values. <sup>2</sup>Significance of warm-cold season ORs,  $p \leq 0.05$ : † = warm; ‡ = cold. <sup>3</sup>Red hue indicates a higher lag day OR value than a lag grid OR value. <sup>4</sup>Underlined cell value identified a difference in the significance of the outcome for a lag grid OR and a lag day OR.
